# Supplementary material
Source: MDPI journal article supplement (https://www.mdpi.com/2304-6740/11/4/147)
Supplement: s1 [file s1]

## Supporting information

### Photoelectrochemical Performance of $\text{CuBi}_2\text{O}_4$ Photocathode with $\text{H}_2\text{O}_2$ as Scavenger

Zohreh Masoumi 1, Mahdi Tayebi 2, S. Ahmad Masoumi Lari 3, Bongkuk Seo 4, Choong-Sun Lim 4, Hyeon-Gook Kim 4,\* , Daeseung Kyung 1,\* and Meysam Tayebi 4,\*

1 Department of Civil and Environment Engineering, University of Ulsan, Daehakro 93, Nam-gu, Ulsan 44610, Republic of Korea

2 Department of Energy Engineering and Physics, Amirkabir University of Technology, Tehran 15875-4413, Iran

3 Department of Biology, York University, Farquharson Life Sciences Building, Ottawa Rd, Toronto, ON M3J1P3, Canada

4 Advanced Industrial Chemistry Research Center, Advanced Convergent Chemistry Division, Korea Research Institute of Chemical Technology (KRICT), 45 Jonggaro, Ulsan 44412, Republic of Korea

\* Correspondence: candoit@kRICT.re.kr (H.-G.K.); dkyung@ulsan.ac.kr (D.K.); mtayebi@kRICT.re.kr or mtayebi2900@gmail.com (M.T.)

## Materials

FTO glass substrate (TEC 7), 100mm\*100mm\*2.2mm,  $R=6-8\Omega/\text{sq}$ , Bismuth(III) nitrate pentahydrate ( $\text{Bi}(\text{NO}_3)_3 \cdot 5\text{H}_2\text{O}$ , ACS reagent,  $\geq 98.0\%$ ), Copper(II) nitrate trihydrate ( $\text{Cu}(\text{NO}_3)_2 \cdot 3\text{H}_2\text{O}$ , ) acetic acid ( $\text{CH}_3\text{CO}_2\text{H}$ , ACS reagent,  $\geq 99.7\%$ ), and ethanol ( $\text{CH}_3\text{CH}_2\text{OH}$ , anhydrous,  $\geq 99.5\%$ ) was procured from Sigma Aldrich. Deionized water was used to prepare all aqueous solutions. All the reagents were used without any purification process.

## Characterization Equipment

To analyze the crystallinity of samples X-ray diffraction (XRD) were carried out (Bruker D8Advance). The morphological properties were studied by transmission electron microscopy (TEM, JEOL, JEM-2100F) and scanning electron microscope (Quanta 250 FEG) utilized to study the thin film of photocatalysts on the surface of FTO glass. A 785 nm laser was used for Raman characterization by a labRam HR micro-Raman spectrophotometer (Bruker, model: Senteraa 2009, Germany). A Thermo Scientific Sigma Probe spectrometer detector was utilized to record the X-ray photoelectron spectroscopy data. The bandgap and adsorption of photocatalysts were evaluated by the UV-DRS method (Perkin Elmer UV-Vis-NIR model Lambda 950).

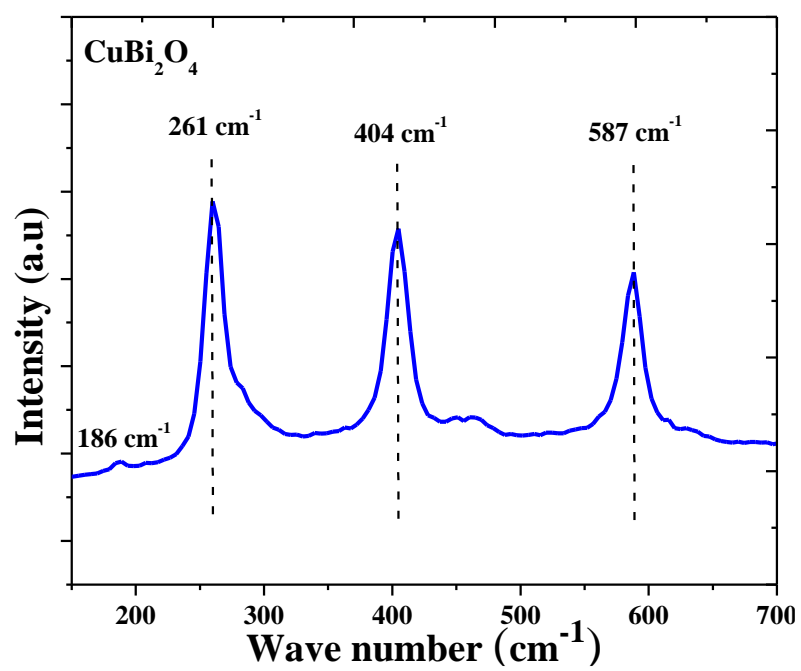

**Figure S1.** Raman spectra of  $\text{CuBi}_2\text{O}_4$  photocathode.

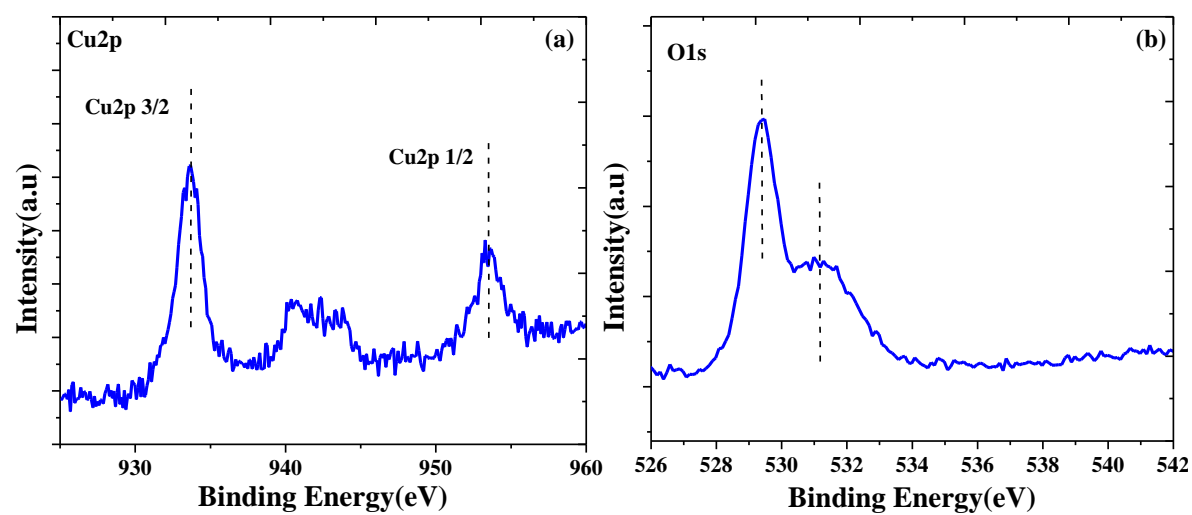

**Figure S2.** XPS High-resolution of (a)  $\text{Cu}2\text{p}$  and (b)  $\text{O}1\text{s}$  for  $\text{CuBi}_2\text{O}_4$  photocathode.

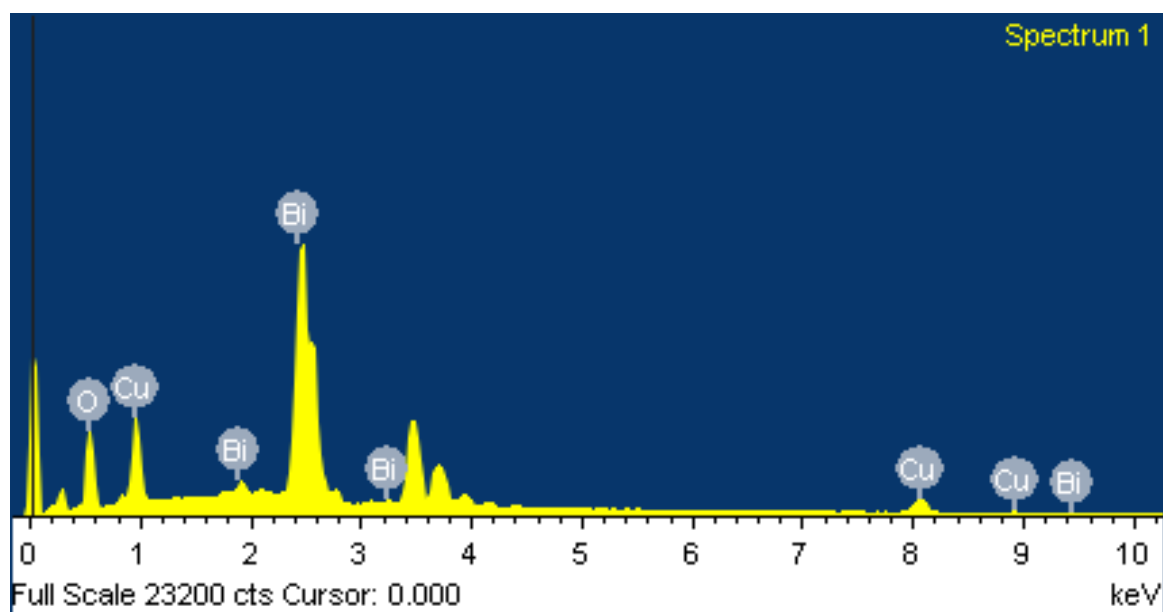

**Figure S3.** EDX spectra of the  $\text{CuBi}_2\text{O}_4$  photocathode.

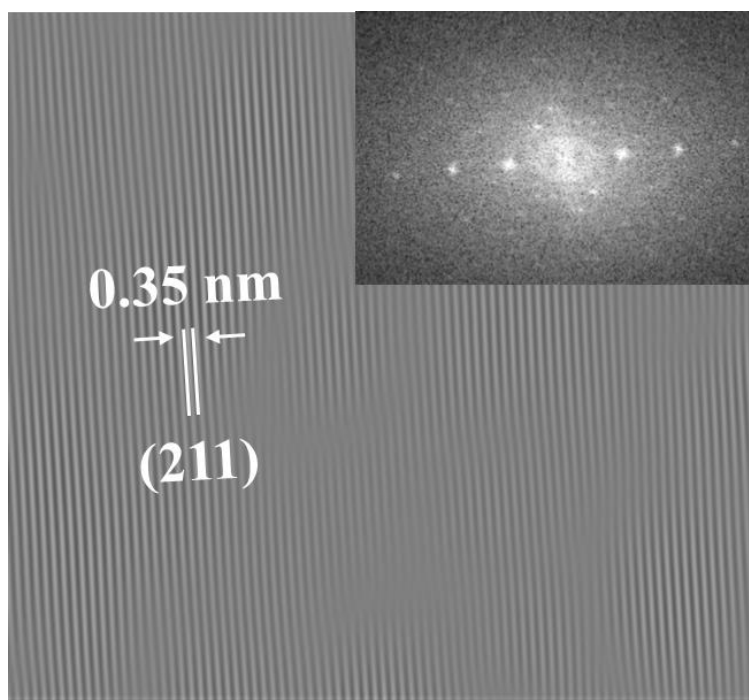

**Figure S4.** Inverse fast Fourier transformed (IFFT) image showing interplanar spacing of 0.35 nm corresponding to (211) lattice plane of  $\text{CuBi}_2\text{O}_4$  [1].

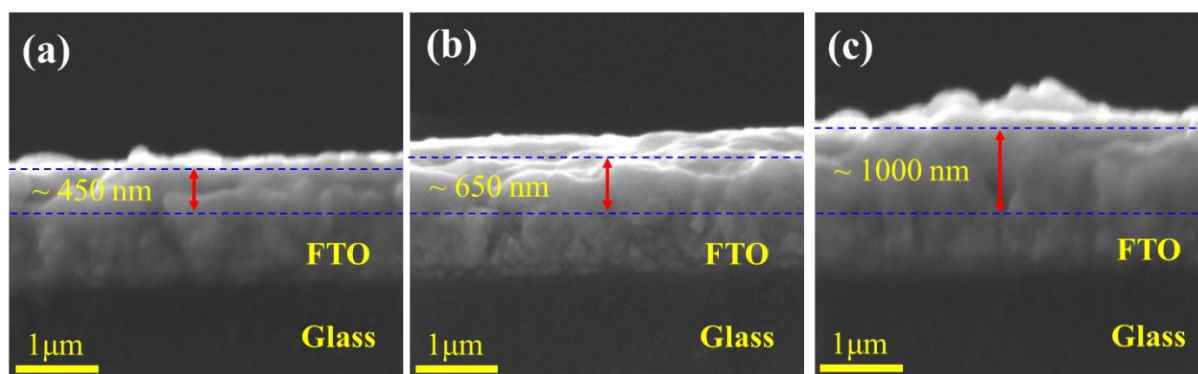

**Figure S5.** SEM cross-section of the #1-CuBi<sub>2</sub>O<sub>4</sub>, #2-CuBi<sub>2</sub>O<sub>4</sub>, and #4-CuBi<sub>2</sub>O<sub>4</sub> photocathodes.

### Mott-Schottky equation and constant volume:

The charge carrier density of the photocathodes was obtained from the following formula [2-4].

$$\frac{1}{C^2} = \frac{2}{\varepsilon \varepsilon_0 A^2 e N_A} (V_{fb} - V - \frac{K_B T}{e})$$

$$Slope = \frac{-2}{\varepsilon \varepsilon_0 A^2 e N_A} \rightarrow N_A = \frac{-2}{\varepsilon \varepsilon_0 A^2 e (Slope)}$$

$$intercept = V_{fb} - \frac{K_B T}{e} \rightarrow V_{fb} = intercept + \frac{K_B T}{e}$$

$$\varepsilon = 98 \text{ for CuBi}_2\text{O}_4$$

$$\varepsilon_0 = 8.854 * 10^{-12} F.m^{-1}$$

$$e = 1.6 * 10^{-19} C$$

$$K_B = 1.381 * 10^{-23} J.K^{-1}$$

$$T = 298 K$$

Where C, e,  $\varepsilon$ ,  $\varepsilon_0$ ,  $N_A$ , A,  $V_{fb}$ , and  $k_B$  are the space charge region capacitance, unit charge, relative permittivity (98 for  $\text{CuBi}_2\text{O}_4$ ), permittivity of free space, acceptor density, electrode area, flat band potential, and Boltzmann's constant, respectively.

**Table S1.** PEC parameters of the  $\text{CuBi}_2\text{O}_4$  photocathodes.

| Photocathode                                            | $R_s (\Omega/\text{cm}^2)$ | $R_{ct} (\Omega/\text{cm}^2)$ | Slope                  | Intercept | $N_A (1/\text{cm}^3)$ | $V_{fb} (V_{RHE})$ |
|---------------------------------------------------------|----------------------------|-------------------------------|------------------------|-----------|-----------------------|--------------------|
| #1- $\text{CuBi}_2\text{O}_4$                           | 12.42                      | 1823.45                       | $-1.27 \times 10^{10}$ | 1.32      | $2.82 \times 10^{19}$ | 1.34               |
| #2- $\text{CuBi}_2\text{O}_4$                           | 14.61                      | 850.37                        | $-3.09 \times 10^9$    | 1.25      | $1.20 \times 10^{20}$ | 1.27               |
| #4- $\text{CuBi}_2\text{O}_4$                           | 13.86                      | 1467.29                       | $-4.81 \times 10^9$    | 1.27      | $7.48 \times 10^{19}$ | 1.29               |
| #2- $\text{CuBi}_2\text{O}_4$<br>$\text{H}_2\text{O}_2$ | 15.89                      | 433.12                        | $-2.12 \times 10^9$    | 1.2       | $1.69 \times 10^{20}$ | 1.22               |



## Reference:

- [1] D. Cao, N. Nasori, Z. Wang, Y. Mi, L. Wen, Y. Yang, S. Qu, Z. Wang, Y. Lei, p-Type  $\text{CuBi}_2\text{O}_4$ : an easily accessible photocathodic material for high-efficiency water splitting, *Journal of Materials Chemistry A*, 4 (2016) 8995-9001.
- [2] J. Jiaqi, Reaction Kinetics of Photoelectrochemical  $\text{CO}_2$  Reduction on a  $\text{CuBi}_2\text{O}_4$ -Based Photocathode, *ACS applied materials & interfaces*, v. 14 (2022) pp. 17509-17519-12022 v.17514 no.17515.
- [3] S.P. Berglund, F.F. Abdi, P. Bogdanoff, A. Chemseddine, D. Friedrich, R. van de Krol, Comprehensive Evaluation of  $\text{CuBi}_2\text{O}_4$  as a Photocathode Material for Photoelectrochemical Water Splitting, *Chemistry of Materials*, 28 (2016) 4231-4242.
- [4] F. Wang, W. Septina, A. Chemseddine, F.F. Abdi, D. Friedrich, P. Bogdanoff, R. van de Krol, S.D. Tilley, S.P. Berglund, Gradient Self-Doped  $\text{CuBi}_2\text{O}_4$  with Highly Improved Charge Separation Efficiency, *Journal of the American Chemical Society*, 139 (2017) 15094-15103.
